# Supplementary material
Source: PubMed Central journal article supplement (PMC2840431)
Supplement: 0907318107_pnas.200907318SI.pdf [file 0907318107_pnas.200907318SI.pdf]

# Supporting Information for

## Indirect land-use changes can overcome carbon savings from biofuels in Brazil

David M. Lapola\*, Ruediger Schaldach, Joseph Alcamo, Alberte Bondeau, Jennifer  
Koch, Christina Koelking, Joerg Priess

\* To whom correspondence should be addressed. Email: lapola@usf.uni-kassel.de

### **This file includes:**

SI Text

SI Figures S1-S6

SI Tables S1-S7

## SI Text

### Determination of the relative importance of $p_i$ factors

The determination of relative importance used in the analytic hierarchy process (AHP) test ( $RI_{AHP}$ , ref. (1)) followed four steps: (i) determination of the coefficient of variation of the given  $p_i$  factor over the entire initial land-use map ( $CV^1_i$ ); (ii) determination of the coefficient of variation of the given  $p_i$  factor only over the grid cells covered by cropland in the initial land-use map ( $CV^2_i$ ); (iii) derivation of an empirical index for the  $p_i$  factor ( $EI_i$ ) by  $CV^1_i/CV^2_i$ ; and (iv) determination of  $RI_{AHP}$  with a pairwise comparison of  $EI_i$  from all  $p_i$  factors.

### Model Evaluation

**Crop/rangeland location.** Because crop/rangeland suitability analysis is the central aspect of LandSHIFT, its ability to determine crop/rangeland spatial distribution requires testing. Therefore, we first compared the suitability computed by LandSHIFT against crop and rangeland distribution on an actual land-use map (11, 12). Cropland areas tend to be located where crop suitability is higher, assuming that cropland is given priority over other land uses (besides urban areas) (13). Fig. S3 shows that suitability for cropland and rangeland indeed tends toward higher values in comparison to suitability for other land uses, suggesting that the suitability analysis used in the model is appropriate for



positives) classified spatial predictions in contingency tables. The resulting curves are shown in Fig. S4. The area under the curve (0.87 for cropland; 0.80 for rangeland) reveals that the spatial pattern of suitability computed by LandSHIFT is not random as exemplified by the 1:1 line, which has an area under the curve of 0.5. This result further confirms that higher suitability values tend to be located in grid cells occupied by cropland and rangeland. Therefore, the ROC method test suggests LandSHIFT is able to represent crop location using suitability analysis. A third analysis regarding crop/rangeland distribution inside major regions in Brazil is presented below.

**Crop/rangeland area.** We compare crop area modeled by LandSHIFT with reported statistics data (15) for the year 2003. At the country level, modeled crop areas of sugarcane and soybean match FAO data almost perfectly, whereas the area covered by ‘other crops’ and rangeland (and therefore livestock density,  $L_d$ ) is overestimated in the model by 13% and 8% respectively. This result suggests the model is able to convert country-scale crop production mass (e.g., Mg) to cropland area ( $\text{km}^2$ ). Model efficiency (18) for the data presented in Fig. S5 is 1.06 (1.0 would represent a perfect match). The overestimation of the ‘other crops’ area is due to some underestimation of crop yields by LPJmL. However, in the case of rangeland, the area overestimation might also be due to the following reasons: (i) the assumption of only one land use per grid cell leads to overestimation of rangeland area, especially in regions where  $L_d$  is low, as in Northeast Brazil; and (ii) rangeland area might not increase in response to increasing livestock herd in all areas of Brazil, as modeled by LandSHIFT. For example in the Amazon region the farmer’s interest is often on guaranteeing ownership over the land rather than on allocating the market demand for livestock on his pastures, and the pasture area may

increase not because of increasing livestock demand but because of less obvious reasons like population migration and lack of governance in the region (19, 20).

Distribution of cropland/rangeland inside major regions in Brazil is in good agreement with statistics on a sub-national level (21) weighted by total crop/rangeland area modeled by LandSHIFT (Fig. S6). The underestimation of rangeland area in southern Brazil is corrected if we add 68,000 km<sup>2</sup> of natural grasslands, which are considered in the Brazilian official statistics as 'natural pasture' but are not included in LandSHIFT calculations. The overestimation of rangeland area in Northeast Brazil is explained by two reasons (i) the difficulty to deal with the extension of rangeland in areas with low Ld (22), and (ii) the rangeland area in Northeast Brazil is overestimated by a factor of 2.3 in the initial land-use map used by LandSHIFT (11, 12). Estimates by Campbell *et al.* (23) suggest that roughly 110,000 km<sup>2</sup> of the rangelands in Northeast Brazil are abandoned (not grazed anymore). These areas are probably not considered as rangeland in the statistics used here for comparison.

**Deforestation rates.** The modeled annual deforestation rate for the Amazon region for the 1992-2003 period compares well with remote sensing data (LandSHIFT: 16,789 km<sup>2</sup>/yr, INPE-PRODES: 18,266 km<sup>2</sup>/yr (24)). The shares of this deforestation among states are also comparable with PRODES, though deforestation in Maranhão is overestimated by a factor of 23. That overestimation is due to the denser road network found in this state compared to Mato Grosso, where deforestation is underestimated by a factor of 5.7. Nevertheless, any comparison between different data sets is biased by the different methods used in the construction of a given map. For example, the initial land-use map for the year 1992 used in LandSHIFT has 80% more forest in the state of

Maranhão compared to the dataset used for comparison here (24). Moreover, capturing the exact location of deforestation in the Amazon region, which is not the goal of this study, might involve other factors that are not accounted for in a country-scale simulation program such as LandSHIFT, in which deforestation is mostly caused by increasing crop and/or livestock demand. The deforestation model developed by Soares-Filho *et al.* (25) is focused on the Amazon basin and considers neither the dynamics of land use occurring at deforested sites, nor the teleconnections between land-use changes in Amazonia and other parts of Brazil. Also, the current version of LandSHIFT does not consider forestry activities, which may contribute to deforestation. The modeled deforestation rate in the Cerrado savanna of Central Brazil for the 1992-2003 period is 17,753 km<sup>2</sup>/yr. This amount lies within the estimated range (13,100-26,000 km<sup>2</sup>/yr) of Cerrado deforestation for the last decade (26). The deforestation of ~5000 km<sup>2</sup> of the Atlantic forest in the 1992-2003 period (27), approximately 55 grid cells in LandSHIFT's resolution, is not captured by the model.

### SI Text References

1. Saaty TL (1980) *The Analytic Hierarchy Process: Planning, Priority Setting, Resource Allocation* (Mcgraw-Hill, Columbus, USA).
2. Fargione J, Hill J, Tilman D, Polasky S, Hawthorne P (2008) Land clearing and the biofuel carbon debt. *Science* 319:1235–1238.
3. Searchinger T, *et al.* (2008) Use of us croplands for biofuels increases greenhouse gases through emissions from land-use change. *Science* 319:1238–1240.

4. Macedo IC, Leal MRLV, Silva JEAR (2004) *Assessment of greenhouse gas emissions in the production and use of fuel ethanol in Brazil* (Government of the State of São Paulo, São Paulo, Brazil).
5. Reinhardt G, Gärtner S, Rettenmaier N, Münch J, von Falkestein E (2007) *Screening life cycle assessment of Jatropha biodiesel* (Institute for Energy and Environmental Research Heidelberg, Heidelberg, Germany).
6. Gärtner SO, Reinhardt GA (2003) *Life cycle assessment of biodiesel: update and new aspects* (Institute for Energy and Environmental Research Heidelberg, Heidelberg, Germany).
7. Center for Jatropha Promotion (2009), *Jatropha world* (<http://www.jatrophabiodiesel.org/indianScene.php>).
8. Renewable Energy UK (2009), *Jatropha for biodiesel figures* (<http://www.reuk.co.uk/Jatropha-for-Biodiesel-Figures.htm>).
9. Agricultural Marketing Service of the USDA (2009) *Livestock and grain market news* (<http://marketnews.usda.gov/portal/lg>).
10. Cerri CEP, *et al.* (2007) Predicted soil organic carbon stocks and changes in the brazilian amazon between 2000 and 2030. *Agr Ecosyst Environ* 122:58–72.
11. Loveland TR, *et al.* (2000) Development of a global land cover characteristics database and IGBP-DISCover from 1 km AVHRR data. *Int J Rem Sen* 21:1303–1330.
12. Heistermann M (2006) Modelling the global dynamics of rain-fed and irrigated croplands (Reports on Earth System Science 37/2006, Max Planck Institute for Meteorology, Hamburg, Germany).



23. Campbell JE, Lobell DB, Genova RC, Field CB (2008) The global potential of bioenergy on abandoned agriculture lands. *Environ Sci Tech* 42:5791–5794.
24. PRODES-INPE (2009), Satellite monitoring of the Amazon forest (<http://www.obt.inpe.br/prodes>).
25. Soares-Filho BS, *et al.* (2006) Modelling conservation in the Amazon basin. *Nature* 440:520–523.
26. Sawyer D (2008) Climate change, biofuels and eco-social impacts in the Brazilian Amazon and Cerrado. *Phil Trans R Soc B* 363:1747–1752.
27. SOS Mata Atlântica, Instituto Nacional de Pesquisas Espaciais (2008) Atlas of the Atlantic Forest Remnants: 2000-2005 Period (in Portuguese, SOS Mata Atlântica and Instituto Nacional de Pesquisas Espaciais, São Paulo, Brazil).













## SI Tables

**Table S1.** Average actual crop yields modeled by LPJmL compared to FAO statistics for Brazil. To match FAO yields, a management factor is applied to the LPJmL yields before the yields are fed into the LandSHIFT model. Modeled net yield changes are split into changes due to technological improvements such as increased irrigation and plant breeding (1, 2) and changes due to climate change (temperature, precipitation and atmospheric CO<sub>2</sub> concentration) (3, 4) in Brazil. A comparison between projected changes and real yield changes in the last 20 years in Brazil is also shown (5).

| Crop type <sup>‡</sup> | Actual yields*,<br>Mg/ha |      | Management<br>factor | 2003-2020 yield changes <sup>†</sup> ,<br>Mg/ha |                   |      | Annual change rate,<br>kg/ha/yr |           |
|------------------------|--------------------------|------|----------------------|-------------------------------------------------|-------------------|------|---------------------------------|-----------|
|                        | LPJmL                    | FAO  |                      | Due to<br>technology                            | Due to<br>climate | Net  | LandSHIFT                       | FAO       |
|                        |                          |      |                      |                                                 |                   |      | 2003-2020                       | 1986-2006 |
| Sugarcane              | 67.9                     | 66.4 | 1.0                  | 26.9                                            | 4.5               | 31.4 | 1850                            | 632       |
| Soybean                | 1.2                      | 2.1  | 1.8                  | 0.6                                             | 0.2               | 0.8  | 46                              | 39        |
| Sunflower/Rapeseed     | 1.4                      | 1.3  | 0.9                  | 0.4                                             | 0.1               | 0.5  | 31                              | 46        |
| Oil palm <sup>§</sup>  | 13.2                     | 10.0 | 0.8                  | 4.1                                             | 6.1               | 10.2 | 600                             | -26       |
| <i>Jatropha curcas</i> | 3.7 <sup>¶</sup>         | -    | 1.0                  | 1.5                                             | 0.1               | 1.6  | 95                              | -         |
| Maize                  | 3.1                      | 2.5  | 0.8                  | 1.5                                             | 0.1               | 1.6  | 94                              | 78        |
| Pulses                 | 2.5                      | 0.6  | 0.2                  | 0.2                                             | 0.0               | 0.2  | 13                              | 21        |
| Rice                   | 5.2                      | 2.6  | 0.5                  | 1.4                                             | 0.4               | 1.8  | 108                             | 93        |

\* For the 1991-2000 period (see ref. 3).

<sup>†</sup> All 2020 yields are below maximum theoretical yields (ref. 6; see also ref. 1 and 2 for assumptions used by the IMPACT model for the 'GEO4-Sustainability First' scenario).

<sup>‡</sup> More than 90% of the cultivated area in Brazil is comprised by these crop types.

<sup>§</sup> Oil palm yields, which are not modeled by the LPJmL model, are derived by applying a factor of 6.0 to the tropical roots crop functional type.

<sup>¶</sup> In fact this is the potential yield (average yield of every grid cell) since there is no consistent information on the location and extension of actual *Jatropha curcas* plantations in Brazil.

1. Rosengrant MW, *et al.* (2008) International model for policy analysis of agricultural commodities and trade (IMPACT): Model description (International Food Policy Research Institute, Washington, USA).
2. Rothman DS, Agard J, Alcamo J (2007) in Global Environment Outlook 4, eds United Nations Environment Programme (Progress Press, Valletta, Malta), pp 395–454.
3. Bondeau A, *et al.* (2007) Modelling the role of agriculture for the 20th century global terrestrial carbon balance. *Global Change Biol* 13:679–706.
4. Lapola DM, Priess JA, Bondeau A (2009) Modeling the land requirements and potential productivity of sugarcane and jatropha in Brazil and India using the LPJmL dynamic global vegetation model. *Biomass and Bioenergy*, 33:1087-1095.
5. Food and Agriculture Organization (2009) FAOSTAT (<http://faostat.fao.org>).
6. Luyten JC (1995) Sustainable world food production and environment (Report 37, Research Institute for Agrobiological and Soil Fertility, Wageningen, the Netherlands)

**Table S2.** Crop production in 2003 (1) and 2020 (2), and 2003-2020 changes in Brazil.

| <b>Crop type</b>             | <b>2003,<br/>Gg</b> | <b>2020,<br/>Gg</b> | <b>Δ, %</b> |
|------------------------------|---------------------|---------------------|-------------|
| Wheat                        | 5033                | 8741                | 73.7        |
| Other temperate cereals      | 744                 | 1402                | 88.6        |
| Rice                         | 11343               | 17619               | 55.3        |
| Maize                        | 41928               | 73640               | 75.6        |
| Tropical cereals             | 1560                | 2831                | 81.5        |
| Pulses                       | 54831               | 105172              | 91.8        |
| Temperate roots              | 3022                | 5447                | 80.3        |
| Tropical roots               | 23811               | 33775               | 41.8        |
| Other annual oil crops       | 443                 | 717                 | 61.8        |
| Soybeans                     | 47604               | 77756               | 63.3        |
| Sugarcane                    | 388184              | 763493              | 96.7        |
| Permanent crops / Vegetables | 53486               | 88349               | 65.2        |
| <b>Total</b>                 | <b>631989</b>       | <b>1178942</b>      | <b>86.5</b> |

1. Food and Agriculture Organization (2009) FAOSTAT (<http://faostat.fao.org>).

2. Rothman DS, Agard J, Alcamo J (2007) in Global Environment Outlook 4, eds United Nations Environment Programme (Progress Press, Valletta, Malta), pp 395–454.

**Table S3.** Weights  $w_i$  for factors  $p_i$  used in LandSHIFT's cropland module for this study.

| <b><math>p_i</math> factor</b> | <b><math>w_i</math> weight</b> |
|--------------------------------|--------------------------------|
| Potential crop yield           | 0.23                           |
| Proximity to cropland          | 0.08                           |
| Proximity to settlements       | 0.04                           |
| Road network                   | 0.13                           |
| Slope                          | 0.23                           |
| Soil fertility                 | 0.29                           |

**Table S4.** Land-use transition constraints ( $c_i$ ) used in this study. Transition to forest or other native habitat is not modeled.

| <b>From \ To</b>            | <b>Urban</b> | <b>Cropland</b> | <b>Rangeland</b> | <b>Set-aside</b> |
|-----------------------------|--------------|-----------------|------------------|------------------|
| <b>Urban</b>                | -            | 0.0             | 0.0              | 0.0              |
| <b>Cropland</b>             | 1.0          | -               | 0.5              | 1.0              |
| <b>Rangeland</b>            | 1.0          | 1.0             | -                | 1.0              |
| <b>Forest</b>               | 1.0          | 0.5             | 0.5              | 0.0              |
| <b>Other native habitat</b> | 1.0          | 0.5             | 0.5              | 0.0              |
| <b>Set-aside</b>            | 1.0          | 1.0             | 1.0              | -                |

**Table S5.** Biofuel production in Brazil in 2003 and projections for 2020 (1, 2).

Sources for biofuel yields: (2-6).

| <b>Biofuel</b> | <b>Year</b> | <b>Volume,<br/>(x10<sup>9</sup><br/>liter)</b> | <b>Feedstock</b>   | <b>Biofuel yield,<br/>(liter/Mg)</b> | <b>Production,<br/>(Tg)</b> |
|----------------|-------------|------------------------------------------------|--------------------|--------------------------------------|-----------------------------|
| Ethanol        | 2003        | 14.5                                           | sugarcane          | 85                                   | 170.59                      |
| Ethanol        | 2020        | 50.03                                          | sugarcane          | 85                                   | 588.53                      |
| Biodiesel      | 2003        | 0.5                                            | soybean            | 200                                  | 2.50                        |
| Biodiesel      | 2020        | 4.47                                           | soybean            | 200                                  | 22.33                       |
| Biodiesel      | 2020        | 4.47                                           | jatropha           | 278                                  | 16.07                       |
| Biodiesel      | 2020        | 4.47                                           | sunflower/rapeseed | 448                                  | 9.97                        |
| Biodiesel      | 2020        | 4.47                                           | oil palm           | 490                                  | 9.12                        |

1. Ministério de Minas e Energia (2006) *Decadal plan for electrical energy expansion 2006-2015* (in Portuguese, Ministry of Mining and Energy, Brasília, Brazil).

2. União da Indústria de Cana-de-Açúcar (2008) *Sugarcane industry in brazil: ethanol, sugar, bioelectricity* (UNICA/ApexBrasil, São Paulo, Brazil).

3. Jongschaap REE, Corré WJ, Bindraban PS, Brandenburg WA (2007) Claims and facts on *Jatropha curcas* L. (Report 158, Plant Research International, Wageningen University, Wageningen, The Netherlands).

4. Achten WMJ, *et al.* (2008) *Jatropha bio-diesel production and use. Biomass & Bioenergy* 32:1063–1084.

5. Crutzen PJ, Mosier AR, Smith KA, Winiwarter W (2008) N<sub>2</sub>O release from agro-biofuel production negates global warming reduction by replacing fossil fuels. *Atmos Chem Phys* 8:389–395.

6. Wirsenius S (2000) *Human use of land and organic materials: modeling the turnover of biomass in the global food system.* (Ph.D. thesis Göteborg University, Göteborg, Sweden).

**Table S6.** Carbon debt estimates (CO<sub>2</sub> emissions from soils and aboveground and belowground biomass caused by land-use change) used in this study.

| Previous land-use (from) | To cropland MgCO <sub>2</sub> e./ha | To rangeland* MgCO <sub>2</sub> e./ha | To well-managed rangeland <sup>†</sup> MgCO <sub>2</sub> e./ha | Source ref. |
|--------------------------|-------------------------------------|---------------------------------------|----------------------------------------------------------------|-------------|
| Cropland                 | 0                                   | 0                                     | 0                                                              | 1           |
| Rangeland                | 75                                  | 0                                     | 0                                                              | 2           |
| Other natural vegetation | 85                                  | 69                                    | 13                                                             | 1           |
| Woody savanna            | 165                                 | 145                                   | 60                                                             | 1           |
| Tropical forest          | 737                                 | 690                                   | 572                                                            | 1           |

\* Soil carbon emissions are 20% lower (see ref. 3).

<sup>†</sup> Soil carbon emissions are hypothetically reduced to zero (see main text's Discussion)

1. Fargione J, Hill J, Tilman D, Polasky S, Hawthorne P (2008) Land clearing and the biofuel carbon debt. *Science* 319:1235–1238.
2. Searchinger T *et al.* (2008) Use of US croplands for biofuels increases greenhouse gases through emissions from land-use change. *Science* 319:1238–1240.
3. Cerri CEP, *et al.* (2007) Predicted soil organic carbon stocks and changes in the brazilian amazon between 2000 and 2030. *Agr Ecosyst Environ* 122:58–72.

**Table S7.** Proportion of total land-use change carbon debt (see Table S6) allocated to biofuel production, and estimates of annual life-cycle GHG reduction from biofuels (including displaced fossil fuels, soil carbon storage and fertilizer use, but not land-use change emissions) used in this study.

| <b>Biofuel</b>               | <b>Debt allocated to biofuel*<br/>%</b> | <b>Source ref.</b> | <b>Annual GHG offset<br/>MgCO<sub>2</sub>e./Gg of<br/>harvested feedstock</b> | <b>Source ref.<sup>¶</sup></b> |
|------------------------------|-----------------------------------------|--------------------|-------------------------------------------------------------------------------|--------------------------------|
| Sugarcane ethanol            | 100                                     | 1                  | 162                                                                           | 1, 5                           |
| Soybean biodiesel            | 39                                      | 1                  | 429                                                                           | 1                              |
| Sunflower/Rapeseed biodiesel | 82 <sup>†</sup>                         | 2                  | 935                                                                           | 6                              |
| Jatropha biodiesel           | 72 <sup>‡</sup>                         | 3, 4               | 378                                                                           | 7                              |
| Oil palm biodiesel           | 87                                      | 1                  | 710                                                                           | 1                              |

\* See ref. 1 for definition.

† Considering 2007 prices of \$1.26 for oil and \$0.2 for seed cake

‡ Considering 2007 prices of \$0.5 for oil and \$0.2 for seed cake

¶ Where more than one reference is cited, average value was used

1. Fargione J, Hill J, Tilman D, Polasky S, Hawthorne P (2008) Land clearing and the biofuel carbon debt. *Science* 319:1235–1238.
2. Agricultural Marketing Service of the USDA (2009) Livestock and grain market news (<http://marketnews.usda.gov/portal/lg>).
3. Center for Jatropha Promotion (2009), Jatropha world (<http://www.jatrophabiodiesel.org/indianScene.php>).
4. Renewable Energy UK (2009), Jatropha for biodiesel figures (<http://www.reuk.co.uk/Jatropha-for-Biodiesel-Figures.htm>).
5. Macedo IC, Leal MRLV, Silva JEAR (2004) *Assessment of greenhouse gas emissions in the production and use of fuel ethanol in Brazil* (Government of the State of São Paulo, São Paulo, Brazil).
6. Gärtner SO, Reinhardt GA (2003) Life cycle assessment of biodiesel: update and new aspects (Institute for Energy and Environmental Research Heidelberg, Heidelberg, Germany).
7. Reinhardt G, Gärtner S, Rettenmaier N, Münch J, von Falkestein E (2007) Screening life cycle assessment of Jatropha biodiesel (Institute for Energy and Environmental Research Heidelberg, Heidelberg, Germany).
